# Supplementary material
Source: PubMed Central journal article supplement (PMC3162439)

Supplemental Fig. 1

(A)

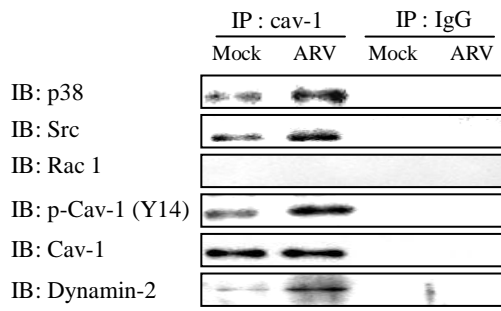

(B)

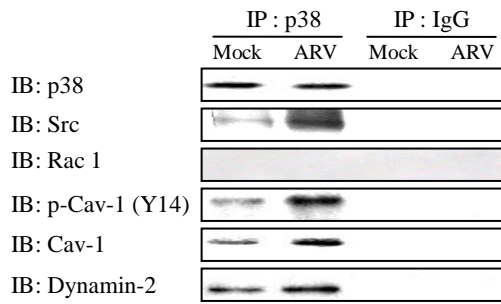

(C)

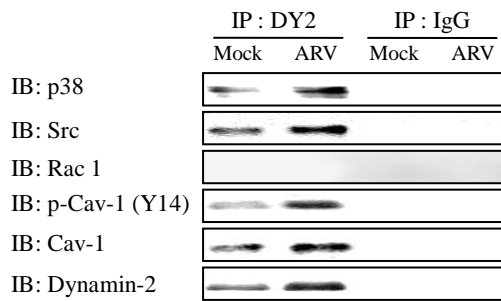

(D)

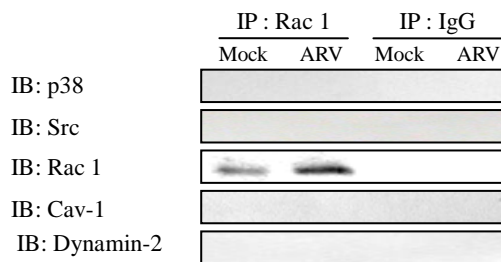

Supplement: supp_M111.257154_jbc.M111.257154-1.pdf [file supp_M111.257154_jbc.M111.257154-1.pdf]

Supplemental Fig. 2

(A)

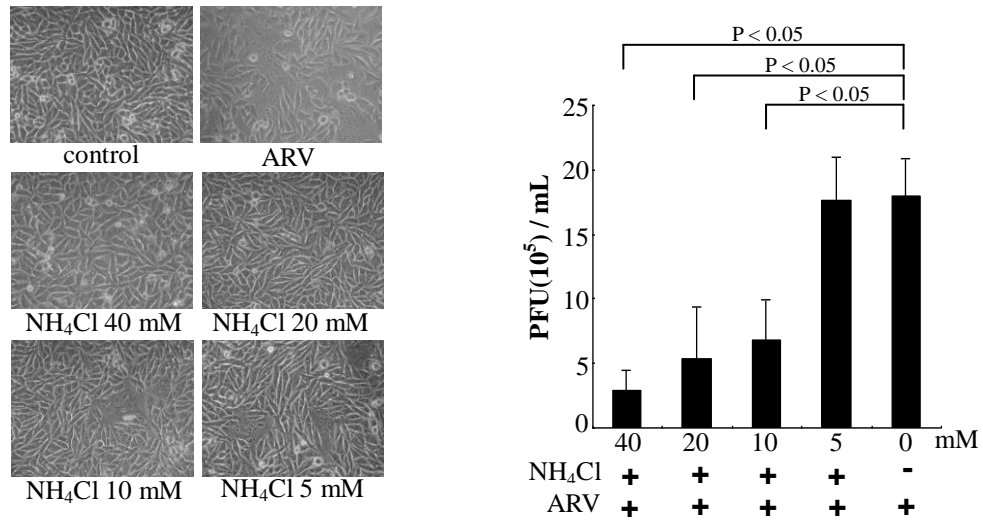

(B)

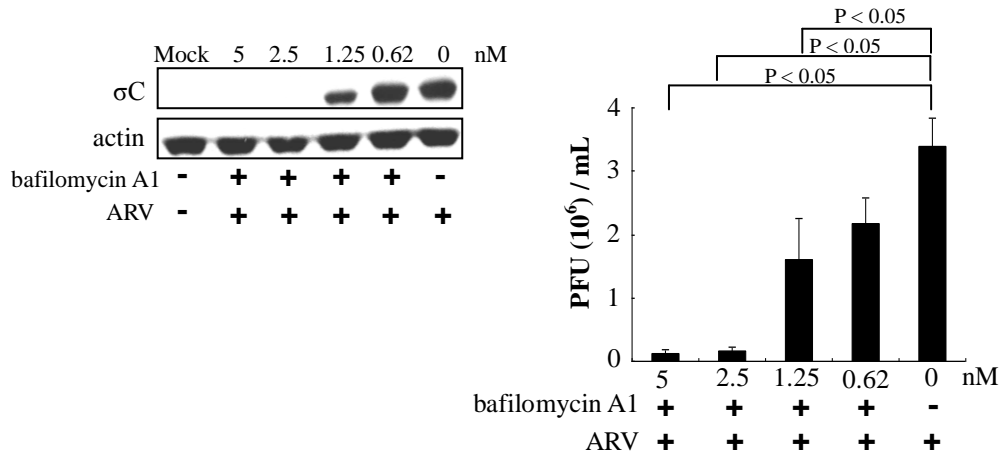

(C)

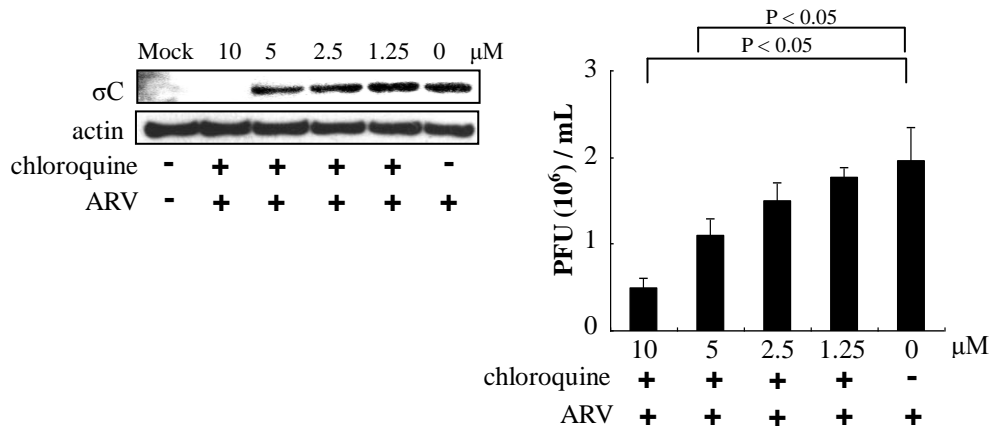

Supplement: supp_M111.257154_jbc.M111.257154-2.pdf [file supp_M111.257154_jbc.M111.257154-2.pdf]
